# Supplementary material for: [RbSr3X][(BS3)2] (X = Cl, Br): two salt-inclusion thioborates with large birefringence and structure transformation from centrosymmetric to asymmetric
Source: Royal Society of Chemistry journal article supplement (doi:10.1039/d3cc05205b), 2023-11-18
Supplement: d3cc05205b1.pdf [file d3cc05205b1.pdf]

## Electronic Supplementary Information

### **[RbSr<sub>3</sub>X][(BS<sub>3</sub>)<sub>2</sub>] (X = Cl, Br): Two salt-inclusion thioborates with large birefringence and structure transformation from centrosymmetric to asymmetric †**

Yihan Yun,<sup>a, b</sup> Xueling Hou,<sup>a, b</sup> Zhihua Yang,<sup>a, b</sup> Guangmao Li,<sup>\*a, b</sup> and Shilie Pan<sup>\*a, b</sup>

*†Research Center for Crystal Materials; CAS Key Laboratory of Functional  
Materials and Devices for Special Environments; Xinjiang Technical Institute of  
Physics & Chemistry, CAS, 40-1 South Beijing Road, Urumqi 830011, China.*

*‡Center of Materials Science and Optoelectronics Engineering, University of Chinese  
Academy of Sciences, Beijing 100049, China.*

*\*Corresponding authors' e-mails: slpan@ms.xjb.ac.cn; ligm@ms.xjb.ac.cn*

*† Electronic supplementary information (ESI) available: Experimental and  
calculation details, related figures, tables and crystal data. CCDC 2299855 for  
[RbSr<sub>3</sub>Cl][(BS<sub>3</sub>)<sub>2</sub>] and 2299856 for [RbSr<sub>3</sub>Br][(BS<sub>3</sub>)<sub>2</sub>]. For ESI and crystallographic  
data in CIF or other electronic format see DOI:xxx*

## Experimental Section

### Synthesis of [RbSr<sub>3</sub>X][(BS<sub>3</sub>)<sub>2</sub>] (X = Cl, Br).

(1) The crystals of [RbSr<sub>3</sub>Cl][(BS<sub>3</sub>)<sub>2</sub>] for single crystal X-ray diffraction were obtained by spontaneous crystallization method. The synthesis processes are as follows: 1) A mixture of RbCl (0.151 g), SrS (0.150 g), B (0.014 g) and S (0.080 g) was mixed in an agate mortar, which was placed in the graphite crucible. 2) The crucible was covered with a tight crucible cap and then moved into a glassy carbon-inwall coated silica tube. 3) The crucible was sealed by oxyhydrogen flame under a vacuumed environment (10<sup>-4</sup> Pa). 4) After that, the sealed tube was put into a temperature program-controlled furnace with the heating progress as follow:

30 °C (50 °C/h) → 180 °C (keep for 5 h) (64 °C/h) → 500 °C (keep for 5 h) (60 °C/h) → 800 °C (keep for 33 h) (9 °C/h) → 500 °C (94 °C/h) → 30 °C.

(2) The crystals of [RbSr<sub>3</sub>Br][(BS<sub>3</sub>)<sub>2</sub>] for single crystal X-ray diffraction were obtained by spontaneous crystallization method. The synthesis process and heating progress are similar to that of [RbSr<sub>3</sub>Cl][(BS<sub>3</sub>)<sub>2</sub>].

**Single X-ray diffraction measurement and structure refinement.** The structure data of [RbSr<sub>3</sub>X][(BS<sub>3</sub>)<sub>2</sub>] (X = Cl, Br) were collected on a Bruker SMART APEX II 4K CCD diffractometer equipped with Mo K $\alpha$  radiation ( $\lambda = 0.71073 \text{ \AA}$ ) operating at 50 kV and 40 mA at room temperature. The data were refined through full-matrix least-squares on  $F^2$  using SHELXTL program package.<sup>1</sup> Structure determination was based on the direct method, and the face-indexed absorption correction was made with XPREP Program. The final structure was checked with PLATON and no higher symmetries were found. During the analysis process, it was found that the Flack was too large and the  $R$  value was too high and Platon detected inverted twins, the matrix was (-1,0,0,0,1,0,0,0,-1). By adding twin instructions, the  $R$  value was decreased to a reasonable level and Flack decreased to 0.02. Owing to the twinning treatment and HKLF5 splitting treatment, the  $R_{\text{int}}$  value is meaningless.

**Powder X-ray diffraction measurement.** X-ray diffraction (XRD) characterization for [RbSr<sub>3</sub>X][(BS<sub>3</sub>)<sub>2</sub>] (X = Cl, Br) was implemented on an automated Bruker D2 X-ray diffractometer from 10 to 70 ° (2 $\theta$ ) with a scan step width of 0.02 ° and a fixed counting time of 1 s/step.

**Rapid temperature rise and fall experiment.** A mixture of RbX (X = Cl, Br), SrS, B and S was mixed in an agate mortar according to stoichiometric ratio, which was placed in the graphite crucible. The crucible was covered with a tight crucible cap and then moved into a glassy carbon-inwall coated silica tube. Then, the silica tube was sealed by oxyhydrogen flame under a vacuumed environment (10<sup>-4</sup> Pa). After that, the sealed tube was put into a temperature program-controlled furnace with the heating progress set as: rising from room temperature to 900 °C within ten hours and then dropping to room temperature within ten hours.

**Energy dispersive X-ray spectroscopy.** Elemental analysis was carried on clean single crystal surfaces with the aid of a field emission scanning electron microscope (SEM, SUPRA 55VP) equipped with an energy dispersive X-ray spectroscope (EDX, BRUKER x-flash-sdd-5010).

**Raman spectroscopy.** To investigate the Raman spectra of  $[\text{RbSr}_3\text{X}][(\text{BS}_3)_2]$  ( $\text{X} = \text{Cl}, \text{Br}$ ), a LABRAM HR Evolution spectrometer equipped with a CCD detector by a 633 nm radiation was used to record Raman scattering spectroscopy data in the 1000–100  $\text{cm}^{-1}$  region. High-quality single crystals of the title compound were put on a glass slide and located by using a  $50\times$  objective lens for the measurements. The laser with 633 nm radiation was applied for the characterizations, and the maximum power was 60 MW. The radiation kept at this power for 15 s to complete the measurements.

**Infrared absorption spectrum.** The IR spectrum was recorded on a Shimadzu IR Affinity-1 Fourier transform infrared spectrometer with a resolution of  $2\text{ cm}^{-1}$ , covering the wavenumber range of 400–4000  $\text{cm}^{-1}$ . The crystal samples and KBr were mixed in the ratio of about 1:100, dried, and ground into fine powder and then pressed into a transparent sheet on the tablet machine. The sheet was loaded in the sample chamber, and then the IR absorption spectrum was measured.

**UV–vis–NIR diffuse reflectance spectroscopy.** Optical diffuse reflectance spectra of  $[\text{RbSr}_3\text{X}][(\text{BS}_3)_2]$  ( $\text{X} = \text{Cl}, \text{Br}$ ) was measured at 298 K on Shimadzu SolidSpec-3700DUV spectrophotometer with a wavelength range of 190–2600 nm, which can provide the visible or UV cut-off edge. The experimental band gaps of  $[\text{RbSr}_3\text{X}][(\text{BS}_3)_2]$  ( $\text{X} = \text{Cl}, \text{Br}$ ) can be estimated by converting the reflectance spectra to absorbance using Kubelka-Munk function.<sup>2</sup>

**Birefringence measurement.** The birefringence of  $[\text{RbSr}_3\text{X}][(\text{BS}_3)_2]$  ( $\text{X} = \text{Cl}, \text{Br}$ ) was characterized by using the polarizing microscope equipped (ZEISS Axio Scope. A1) with Berek compensator.<sup>3–5</sup> The wavelength of the light source was 546 nm. The difference in the optical path ( $R$ ) for one direction was determined according to the interference color with the maximum value of the crystal under the polarized light.

The formula for calculating the birefringence is listed below,

$$R = |N_2 - N_1| \times T = \Delta n \times T.$$

Herein,  $\Delta n$  means the difference of refractive index, and  $T$  denotes the thickness of the crystal.

**Powder laser-induced damage threshold measurement.** On the same measurement condition, the LIDT of  $[\text{RbSr}_3\text{X}][(\text{BS}_3)_2]$  ( $\text{X} = \text{Cl}, \text{Br}$ ) was evaluated by a single-pulse measurement method, with  $\text{AgGaS}_2$  as the reference. The samples of  $[\text{RbSr}_3\text{X}][(\text{BS}_3)_2]$  ( $\text{X} = \text{Cl}, \text{Br}$ ) and  $\text{AgGaS}_2$  were finely ground and sieved, among which samples with a particle size among 45–63  $\mu\text{m}$  were collected and pressed into the sample trays. The samples were exposed to a pulsed laser beam (2.09  $\mu\text{m}$ , 50 ns, 3 Hz) while the pulse energy was continuously increased. Energy increase was stopped when a damage occurrence (color change) was detected on the sample surface under a microscope.

**Second-harmonic generation.** The SHG response of  $[\text{RbSr}_3\text{Br}][(\text{BS}_3)_2]$  was measured through the Kurtz–Perry method with a 2.09  $\mu\text{m}$  Q-switch laser.<sup>6</sup> The  $[\text{RbSr}_3\text{Br}][(\text{BS}_3)_2]$  samples were ground and sieved into different particle sizes: 45–63, 63–90, 90–125, 125–180, and 180–212  $\mu\text{m}$ . These samples were placed between two glass microscope slides and fixed with a 1 mm-thick, 8 mm-diameter silicone. Then, they were placed into a Q-switched Ho:Tm:Cr:YAG laser with a wavelength of 2.09  $\mu\text{m}$ , and the SHG signals were recorded by an oscilloscope connected to the laser. The  $\text{AgGaS}_2$  samples with the same particle sizes were used as the references.

**First-principles calculations.** The theoretical calculations were implemented in the CASTEP using a planewave pseudopotential method based on density function theory<sup>7</sup> to obtain the electronic structures and optical properties for [RbSr<sub>3</sub>X][(BS<sub>3</sub>)<sub>2</sub>] (X = Cl, Br) and Sr<sub>3</sub>B<sub>2</sub>S<sub>6</sub>. The generalized gradient approximation (GGA)<sup>8</sup> was adopted, and the Perdew-Burke-Ernzerhof (PBE) functional<sup>9</sup> was chosen to describe the exchange-correlation energy, with the energy cutoff of 750 and 650 eV, respectively. The *k*-point separation for each material was set as 0.035 Å<sup>-1</sup> in the Brillouin zone. Norm-conserving pseudopotentials (NCP)<sup>10</sup> were employed for each atomic species with the following valence configurations: Rb-4s<sup>2</sup>4p<sup>6</sup>5s<sup>1</sup>, Sr-4s<sup>2</sup>4p<sup>6</sup>5s<sup>2</sup>, B-2s<sup>2</sup>2p<sup>1</sup>, S-3s<sup>2</sup>3p<sup>4</sup>, Cl-3s<sup>2</sup>3p<sup>5</sup>, Br-4s<sup>2</sup>4p<sup>5</sup>. Other calculation parameters and convergent criteria were set as the default values of the CASTEP package.<sup>11</sup> For [RbSr<sub>3</sub>X][(BS<sub>3</sub>)<sub>2</sub>] (X = Cl, Br), the bandgap difference between the experimental values and the values calculated by GGA method was used as the scissors operation to calculate the birefringence and the SHG coefficients. The corresponding values of scissors operation were set as 1.04 and 1.15 eV. For Sr<sub>3</sub>B<sub>2</sub>S<sub>6</sub>, the Heyd-Scuseria-Ernzerhof (HSE06) hybrid functional<sup>12</sup> was adopted for more accurate band gap values since there was no experimental band gap. The bandgap difference between the HSE value and the value calculated by GGA method was used as the scissors operation to calculate the birefringence. The corresponding value of scissors operation were set as 0.98 eV. The Gaussian 09 package was employed to explore the NLO-related effect of thioborates anionic groups, including [BS<sub>3</sub>], [BS<sub>4</sub>], [BO<sub>3</sub>], [BO<sub>4</sub>] and [GaS<sub>4</sub>] groups. B3LYP (Becke, three-parameter, Lee-Yang-Parr) exchange-correlation functional with the Lee-Yang-Parr correlation functional at the 6-31G basis set was adopted.

**Calculation methods for optical properties.** The calculations of the linear optical performance were described in terms of the complex dielectric constant  $\varepsilon(\omega) = \varepsilon_1(\omega) + i\varepsilon_2(\omega)$ . The imaginary part  $\varepsilon_2(\omega)$  of the dielectric function  $\varepsilon(\omega)$  was calculated by using momentum matrix elements between the occupied and unoccupied electronic states:

$$\varepsilon_2(\hbar\omega) = \frac{2e^2\pi}{\Omega\varepsilon_0} \sum_{kcv} |\langle \psi_k^c | \hat{u} \cdot r | \psi_k^v \rangle|^2 \delta[E_k^c - E_k^v - E]$$

Here  $\Omega$  is the unit cell volume, *v* and *c* represent the valence bands and conduction bands, respectively.  $\omega$  and  $\hat{u}$  are the frequency and the unit vector in the polarization direction of the incident light. Under the periodic boundary condition,  $|\langle \psi_k^c | \hat{u} \cdot r | \psi_k^v \rangle|$  is the transition matrix element between the valence bands and the conduction bands at a specific *k* point in the first Brillouin zone. The real part  $\varepsilon_1(\omega)$  can be obtained from the imaginary part  $\varepsilon_2(\omega)$  by using the Kramers-Kronig transformation. The refractive index *n* and birefringence  $\Delta n$  can be obtained from the complex dielectric function.<sup>13</sup> Furthermore, the response electron distribution anisotropy (REDA) method<sup>14</sup> was employed to identify the contribution of each group to birefringence and the birefringence can be estimated as follow:

$$\Delta n = \frac{\Re \sum_g [N_c Z_a \Delta \rho^b]_g}{2n_1 E_o}$$

Here,  $\mathcal{R}$  is the correction coefficient,  $N_c$  is the coordination number of the nearest

neighbor cations to the central anion,  $Z_a$  is the formal chemical valence of the anion,  $\Delta\rho^b$  is the difference between the maximum and minimum of the covalent electron density of the covalent bond on the optical principal axes of a crystal,  $E_o$  is the optical bandgap,  $n_1$  is the minimum refractive index. The second-order susceptibility  $\chi^{(2)}$  tensors are calculated by the so-called length-gauge formalism derived by Sipe and developed by Lin et al. At a zero frequency, the static second-order nonlinear susceptibilities can be described to virtual electrons (VE) and virtual hole (VH) processes. As shown below:

$$\chi_{\alpha\beta\gamma}^{(2)} = \chi_{\alpha\beta\gamma}^{(2)}(\text{VE}) + \chi_{\alpha\beta\gamma}^{(2)}(\text{VH})$$

Where  $\chi_{\alpha\beta\gamma}^{(2)}(\text{VE})$  and  $\chi_{\alpha\beta\gamma}^{(2)}(\text{VH})$  are computed with the formulas as follows:

$$\begin{aligned} \chi_{\alpha\beta\gamma}^{(2)}(\text{VE}) &= \frac{e^3}{2\hbar^2 m^3} \sum_{vcc'} \int \frac{d^3k}{4\pi^3} P(\alpha\beta\gamma) \text{Im} [p_{cv}^\alpha p_{cc'}^\beta p_{c'v}^\gamma] \\ &\quad \times \left( \frac{1}{\omega_{cv}^3 \omega_{vc'}^2} + \frac{2}{\omega_{vc}^4 \omega_{c'v}} \right) \\ \chi_{\alpha\beta\gamma}^{(2)}(\text{VH}) &= \frac{e^3}{2\hbar^2 m^3} \sum_{vv'c} \int \frac{d^3k}{4\pi^3} P(\alpha\beta\gamma) \text{Im} [p_{vv'}^\alpha p_{c'v}^\beta p_{cv}^\gamma] \\ &\quad \times \left( \frac{1}{\omega_{cv}^3 \omega_{v'c}^2} + \frac{2}{\omega_{vc}^4 \omega_{c'v}} \right) \end{aligned}$$

Here,  $\alpha$ ,  $\beta$ , and  $\gamma$  are the Cartesian components;  $v/v'$  and  $c/c'$  denote the valence bands and conduction bands;  $P(\alpha\beta\gamma)$ ,  $\hbar\omega_{ij}$ , and  $p_{ij}^\alpha$  refer to the full permutation, band energy difference, and momentum matrix elements, respectively.

**Table S1.** Crystal data and structure refinement for [RbSr<sub>3</sub>X][(BS<sub>3</sub>)<sub>2</sub>] (X = Cl, Br).

| empirical formula                                                         | [RbSr <sub>3</sub> Cl][(BS <sub>3</sub> ) <sub>2</sub> ]                                     | [RbSr <sub>3</sub> Br][(BS <sub>3</sub> ) <sub>2</sub> ]                                    |
|---------------------------------------------------------------------------|----------------------------------------------------------------------------------------------|---------------------------------------------------------------------------------------------|
| formula weight                                                            | 597.76                                                                                       | 642.22                                                                                      |
| temperature                                                               | 293.00 K                                                                                     | 300.00 K                                                                                    |
| crystal system, space group                                               | orthorhombic, <i>Pbca</i>                                                                    | orthorhombic, <i>Cmc2<sub>1</sub></i>                                                       |
| unit cell dimensions                                                      | $a = 11.0820(4) \text{ \AA}$<br>$b = 7.9064(3) \text{ \AA}$<br>$c = 29.1239(14) \text{ \AA}$ | $a = 15.044(4) \text{ \AA}$<br>$b = 10.9780(3) \text{ \AA}$<br>$c = 7.8706(19) \text{ \AA}$ |
| volume                                                                    | 2551.80(18) $\text{\AA}^3$                                                                   | 1299.9(6) $\text{\AA}^3$                                                                    |
| Z, calculated density                                                     | 8, 3.112 g/cm <sup>3</sup>                                                                   | 4, 3.281 g/cm <sup>3</sup>                                                                  |
| absorption coefficient                                                    | 17.426 mm <sup>-1</sup>                                                                      | 19.972 mm <sup>-1</sup>                                                                     |
| <i>F</i> (000)                                                            | 2192.0                                                                                       | 1168.0                                                                                      |
| 2 $\theta$ range for data collection                                      | 4.618 – 55.062 °                                                                             | 4.594 – 55.054 °                                                                            |
| limiting indices                                                          | $-14 \leq h \leq 14, -10 \leq k \leq 9,$<br>$-37 \leq l \leq 37$                             | $0 \leq h \leq 19, 0 \leq k \leq 14,$<br>$-10 \leq l \leq 10$                               |
| reflections collected/unique                                              | 19247/2926 [ <i>R</i> (int) = 0.0702]                                                        | 1491/1491 [ <i>R</i> (int) = N/A <sup>b</sup> ]                                             |
| refinement method                                                         | full-matrix least-squares on <i>F</i> <sup>2</sup>                                           | full-matrix least-squares on <i>F</i> <sup>2</sup>                                          |
| data/restraints/parameters                                                | 2926/0/119                                                                                   | 1491/1/65                                                                                   |
| goodness-of-fit on <i>F</i> <sup>2</sup>                                  | 1.051                                                                                        | 1.207                                                                                       |
| final <i>R</i> indices [ <i>I</i> > 2 $\sigma$ ( <i>I</i> )] <sup>a</sup> | $R_1 = 0.0375, wR_2 = 0.0867$                                                                | $R_1 = 0.0222, wR_2 = 0.0513$                                                               |
| <i>R</i> indices (all data) <sup>a</sup>                                  | $R_1 = 0.0541, wR_2 = 0.0952$                                                                | $R_1 = 0.0223, wR_2 = 0.0514$                                                               |
| largest diff. peak and hole                                               | 1.91 and -1.43 e $\cdot\text{\AA}^{-3}$                                                      | 1.41 and -1.42 e $\cdot\text{\AA}^{-3}$                                                     |
| flack parameter                                                           | N/A <sup>b</sup>                                                                             | 0.017 (3)                                                                                   |

<sup>a</sup> $R_1 = \Sigma||F_o| - |F_c||/\Sigma|F_o|$  and  $wR_2 = [\Sigma w(F_o^2 - F_c^2)^2/\Sigma wF_o^4]^{1/2}$  for  $F_o^2 > 2\sigma(F_o^2)$

<sup>b</sup>N/A=not available

**Table S2. The atomic coordinates, equivalent isotropic displacement parameters and BVS in [RbSr<sub>3</sub>Cl][(BS<sub>3</sub>)<sub>2</sub>].**

| <b>Atom</b> | <b>x</b>   | <b>y</b>   | <b>z</b>  | <b>U(eq)</b> | <b>BVS</b> |
|-------------|------------|------------|-----------|--------------|------------|
| Rb1         | 1302.2(7)  | 8156.2(11) | 6222.9(2) | 48.8(2)      | 0.99       |
| Sr1         | 4503.1(5)  | 7703.2(6)  | 5219.6(2) | 18.83(15)    | 2.05       |
| Sr2         | 4474.5(5)  | 7355.9(6)  | 7278.8(2) | 18.74(15)    | 2.05       |
| Sr3         | 2872.1(5)  | 2365.4(6)  | 8736.3(2) | 19.80(14)    | 1.89       |
| B1          | 2234(5)    | 5094(7)    | 7771(2)   | 16.8(11)     | 3.04       |
| B2          | 2429(5)    | 5245(7)    | 4706(2)   | 19.3(12)     | 3.03       |
| S1          | 3715.2(11) | 4970.8(16) | 8041.7(5) | 19.5(3)      | 2.05       |
| S2          | 958.8(12)  | 4523.0(16) | 8140.4(5) | 19.7(3)      | 2.15       |
| S3          | 1158.7(12) | 4712.4(16) | 4337.4(5) | 19.3(3)      | 2.12       |
| S4          | 3924.7(12) | 5163.1(16) | 4447.7(5) | 20.0(3)      | 2.02       |
| S5          | 1989.1(13) | 5767.0(18) | 7191.1(5) | 27.2(3)      | 1.85       |
| S6          | 2121.1(14) | 5910.0(19) | 5288.4(5) | 28.6(3)      | 1.90       |
| Cl1         | 4209.1(14) | 7522.7(17) | 6249.3(5) | 27.2(3)      | 0.94       |

**Table S3. The atomic coordinates, equivalent isotropic displacement parameters and BVS in [RbSr<sub>3</sub>Br][(BS<sub>3</sub>)<sub>2</sub>].**

| <b>Atom</b> | <b>x</b>  | <b>y</b>   | <b>z</b>   | <b>U(eq)</b> | <b>BVS</b> |
|-------------|-----------|------------|------------|--------------|------------|
| Rb1         | 5000      | 3552.1(7)  | 2840.7(13) | 30.7(2)      | 1.17       |
| Sr1         | 10000     | 5363.1(5)  | 7699.0(7)  | 14.39(15)    | 1.80       |
| Sr2         | 7101.8(2) | 6992.7(3)  | 2629.4(6)  | 13.06(13)    | 1.99       |
| B1          | 8110(3)   | 4701(4)    | 4904(7)    | 13.0(10)     | 3.04       |
| S1          | 8790.7(9) | 3388.3(11) | 5473.2(15) | 14.4(2)      | 2.08       |
| S2          | 8657.2(8) | 6190.2(10) | 5033.8(16) | 14.4(2)      | 2.00       |
| S3          | 6995.2(8) | 4484.3(12) | 4167.8(18) | 19.7(3)      | 1.94       |
| Br1         | 5000      | 6579.4(6)  | 2305.8(9)  | 20.85(19)    | 0.99       |



**Table S4. Selected bond lengths [Å] for [RbSr<sub>3</sub>Cl][BS<sub>3</sub>]<sub>2</sub>.**

| Atom | Atom             | Length/Å   | Atom | Atom             | Length/Å   |
|------|------------------|------------|------|------------------|------------|
| Rb1  | S2 <sup>11</sup> | 3.2992(15) | Sr2  | S2 <sup>4</sup>  | 3.0763(15) |
| Rb1  | Cl1 <sup>4</sup> | 3.4994(16) | Sr2  | Cl1              | 3.0154(17) |
| Rb1  | Cl1              | 3.2611(17) | Sr2  | S5 <sup>6</sup>  | 3.4247(17) |
| Rb1  | S3 <sup>12</sup> | 3.9043(16) | Sr2  | S5               | 3.0380(15) |
| Rb1  | S4 <sup>13</sup> | 3.5387(15) | Sr2  | S5 <sup>4</sup>  | 3.1575(14) |
| Rb1  | S5 <sup>4</sup>  | 3.9745(18) | Sr3  | S1               | 3.0345(14) |
| Rb1  | S5               | 3.4783(16) | Sr3  | S1 <sup>7</sup>  | 3.2818(14) |
| Rb1  | S6               | 3.3740(16) | Sr3  | S2               | 3.2275(14) |
| Rb1  | S6 <sup>4</sup>  | 3.8987(19) | Sr3  | S2 <sup>7</sup>  | 3.1209(14) |
| Sr1  | Cl1              | 3.0199(16) | Sr3  | Cl1 <sup>8</sup> | 3.2372(16) |
| Sr1  | S3 <sup>3</sup>  | 3.0341(14) | Sr3  | S3 <sup>9</sup>  | 3.0913(14) |
| Sr1  | S3 <sup>4</sup>  | 3.1087(14) | Sr3  | S3 <sup>10</sup> | 3.0608(14) |
| Sr1  | S4 <sup>5</sup>  | 3.0182(14) | Sr3  | S4 <sup>9</sup>  | 3.4752(15) |
| Sr1  | S4               | 3.0819(14) | Sr3  | S4 <sup>10</sup> | 3.1066(14) |
| Sr1  | S6               | 3.0031(15) | B1   | S1               | 1.824(6)   |
| Sr1  | S6 <sup>3</sup>  | 3.4364(18) | B1   | S2               | 1.833(6)   |
| Sr1  | S6 <sup>4</sup>  | 3.1159(15) | B2   | S3               | 1.820(6)   |
| Sr2  | S1               | 3.0333(14) | B2   | S4               | 1.821(6)   |
| Sr2  | S1 <sup>2</sup>  | 3.0283(14) | B1   | S5               | 1.791(6)   |
| Sr2  | S2 <sup>6</sup>  | 3.0353(14) | B2   | S6               | 1.808(7)   |

<sup>1</sup>1-X,2-Y,1-Z; <sup>2</sup>1-X,1/2+Y,3/2-Z; <sup>3</sup>1/2+X,3/2-Y,1-Z; <sup>4</sup>1/2-X,1/2+Y,+Z; <sup>5</sup>1-X,1-Y,1-Z;  
<sup>6</sup>1/2+X,+Y,3/2-Z; <sup>7</sup>1/2-X,-1/2+Y,+Z; <sup>8</sup>1-X,-1/2+Y,3/2-Z; <sup>9</sup>1/2-X,1-Y,1/2+Z; <sup>10</sup>+X,1/2-  
Y,1/2+Z; <sup>11</sup>-X,1/2+Y,3/2-Z; <sup>12</sup>-X,1-Y,1-Z; <sup>13</sup>-1/2+X,3/2-Y,1-Z

**Table S5. Selected bond lengths [Å] for [RbSr<sub>3</sub>Br][(BS<sub>3</sub>)<sub>2</sub>].**

| Atom | Atom             | Length/Å   | Atom | Atom            | Length/Å   |
|------|------------------|------------|------|-----------------|------------|
| Rb1  | S1 <sup>10</sup> | 3.3645(15) | Sr1  | S2 <sup>4</sup> | 3.0505(14) |
| Rb1  | S1 <sup>11</sup> | 3.3645(15) | Sr1  | S2 <sup>1</sup> | 3.2196(13) |
| Rb1  | S2 <sup>12</sup> | 3.7127(16) | Sr2  | Br1             | 3.2045(9)  |
| Rb1  | S2 <sup>13</sup> | 3.7127(16) | Sr2  | S1 <sup>6</sup> | 3.0265(14) |
| Rb1  | S3               | 3.3389(14) | Sr2  | S1 <sup>7</sup> | 3.0840(15) |
| Rb1  | S3 <sup>14</sup> | 3.3390(14) | Sr2  | S2 <sup>5</sup> | 3.0752(13) |
| Sr1  | Br1 <sup>2</sup> | 3.3709(12) | Sr2  | S2              | 3.1358(14) |
| Sr1  | S1 <sup>3</sup>  | 3.1554(14) | Sr2  | S3              | 3.0125(14) |
| Sr1  | S1               | 3.3285(14) | Sr2  | S3 <sup>6</sup> | 3.2854(16) |
| Sr1  | S1 <sup>4</sup>  | 3.3286(14) | Sr2  | S3 <sup>7</sup> | 3.1746(15) |
| Sr1  | S1 <sup>1</sup>  | 3.1554(14) | B1   | S1              | 1.824(5)   |
| Sr1  | S2               | 3.0505(14) | B1   | S2              | 1.834(5)   |
| Sr1  | S2 <sup>3</sup>  | 3.2196(13) | B1   | S3              | 1.790(5)   |

<sup>1</sup>2-X,1-Y,1/2+Z; <sup>2</sup>3/2-X,3/2-Y,1/2+Z; <sup>3</sup>+X,1-Y,1/2+Z; <sup>4</sup>2-X,+Y,+Z; <sup>5</sup>3/2-X,3/2-Y,-1/2+Z; <sup>6</sup>3/2-X,1/2+Y,+Z; <sup>7</sup>+X,1-Y,-1/2+Z; <sup>8</sup>1-X,1-Y,1/2+Z; <sup>9</sup>1-X,1-Y,-1/2+Z; <sup>10</sup>3/2-X,1/2-Y,-1/2+Z; <sup>11</sup>-1/2+X,1/2-Y,-1/2+Z; <sup>12</sup>-1/2+X,-1/2+Y,+Z; <sup>13</sup>3/2-X,-1/2+Y,+Z; <sup>14</sup>1-X,+Y,+Z

**Table S6. Selected bond angles [°] for [RbSr<sub>3</sub>Cl][*(BS*<sub>3</sub>)<sub>2</sub>].**

| Atom             | Atom | Atom             | Angle/°   | Atom            | Atom | Atom             | Angle/°    |
|------------------|------|------------------|-----------|-----------------|------|------------------|------------|
| S2 <sup>11</sup> | Rb1  | Cl1 <sup>3</sup> | 62.71(4)  | S6              | Sr1  | Cl1              | 79.43(4)   |
| S2 <sup>11</sup> | Rb1  | S3 <sup>12</sup> | 83.95(4)  | S6              | Sr1  | S3 <sup>3</sup>  | 95.11(4)   |
| S2 <sup>11</sup> | Rb1  | S4 <sup>13</sup> | 67.77(4)  | S6              | Sr1  | S3 <sup>4</sup>  | 145.19(4)  |
| S2 <sup>11</sup> | Rb1  | S5               | 83.60(4)  | S6              | Sr1  | S4 <sup>5</sup>  | 97.56(4)   |
| S2 <sup>11</sup> | Rb1  | S5 <sup>3</sup>  | 78.05(4)  | S6              | Sr1  | S4               | 63.78(4)   |
| S2 <sup>11</sup> | Rb1  | S6 <sup>3</sup>  | 123.35(4) | S6              | Sr1  | S6 <sup>3</sup>  | 82.650(18) |
| S2 <sup>11</sup> | Rb1  | S6               | 146.10(4) | S6 <sup>3</sup> | Sr1  | S6 <sup>4</sup>  | 104.82(4)  |
| Cl1              | Rb1  | Cl1 <sup>3</sup> | 108.12(4) | S6              | Sr1  | S6 <sup>4</sup>  | 157.14(2)  |
| Cl1              | Rb1  | S3 <sup>12</sup> | 127.64(4) | S2 <sup>6</sup> | Sr2  | S5 <sup>3</sup>  | 151.18(4)  |
| Cl1 <sup>3</sup> | Rb1  | S3 <sup>12</sup> | 117.98(4) | S2 <sup>3</sup> | Sr2  | S5 <sup>3</sup>  | 60.67(4)   |
| Cl1 <sup>3</sup> | Rb1  | S4 <sup>13</sup> | 61.39(4)  | Cl1             | Sr2  | S1               | 136.76(4)  |
| Cl1              | Rb1  | S4 <sup>13</sup> | 143.73(4) | Cl1             | Sr2  | S1 <sup>2</sup>  | 74.23(4)   |
| Cl1              | Rb1  | S5               | 71.41(4)  | Cl1             | Sr2  | S2 <sup>6</sup>  | 71.65(4)   |
| Cl1              | Rb1  | S5 <sup>3</sup>  | 65.94(4)  | Cl1             | Sr2  | S2 <sup>3</sup>  | 140.49(4)  |
| Cl1 <sup>3</sup> | Rb1  | S5 <sup>3</sup>  | 63.20(4)  | S1              | Sr2  | S5 <sup>6</sup>  | 70.58(4)   |
| Cl1 <sup>3</sup> | Rb1  | S6 <sup>3</sup>  | 62.42(4)  | S2 <sup>6</sup> | Sr2  | S2 <sup>3</sup>  | 145.46(3)  |
| Cl1              | Rb1  | S6               | 70.88(4)  | S2 <sup>3</sup> | Sr2  | S5 <sup>6</sup>  | 87.91(4)   |
| Cl1              | Rb1  | S6 <sup>3</sup>  | 70.10(4)  | S2 <sup>6</sup> | Sr2  | S5               | 98.76(4)   |
| S4 <sup>13</sup> | Rb1  | S6 <sup>3</sup>  | 74.85(3)  | S2 <sup>6</sup> | Sr2  | S5 <sup>6</sup>  | 57.97(4)   |
| S5               | Rb1  | Cl1 <sup>3</sup> | 123.60(4) | S5              | Sr2  | S5 <sup>6</sup>  | 128.61(4)  |
| S5               | Rb1  | S3 <sup>12</sup> | 100.15(4) | S5 <sup>3</sup> | Sr2  | S5 <sup>6</sup>  | 140.16(4)  |
| S5               | Rb1  | S4 <sup>13</sup> | 144.52(4) | Cl1             | Sr2  | S5               | 81.14(4)   |
| S5               | Rb1  | S5 <sup>3</sup>  | 66.59(3)  | Cl1             | Sr2  | S5 <sup>6</sup>  | 122.93(4)  |
| S5               | Rb1  | S6 <sup>3</sup>  | 140.45(4) | Cl1             | Sr2  | S5 <sup>3</sup>  | 80.33(4)   |
| S6               | Rb1  | Cl1 <sup>3</sup> | 125.49(4) | S5              | Sr2  | S2 <sup>3</sup>  | 99.06(4)   |
| S6               | Rb1  | S3 <sup>12</sup> | 62.94(3)  | S5              | Sr2  | S5 <sup>3</sup>  | 83.15(2)   |
| S6 <sup>3</sup>  | Rb1  | S3 <sup>12</sup> | 110.23(3) | S1              | Sr3  | S1 <sup>7</sup>  | 98.38(4)   |
| S6               | Rb1  | S4 <sup>13</sup> | 87.29(4)  | S1              | Sr3  | S2               | 59.01(3)   |
| S6               | Rb1  | S5 <sup>3</sup>  | 135.85(4) | S1              | Sr3  | S2 <sup>7</sup>  | 89.45(4)   |
| S6 <sup>3</sup>  | Rb1  | S5 <sup>3</sup>  | 89.52(4)  | S1              | Sr3  | Cl1 <sup>8</sup> | 71.03(4)   |
| S6               | Rb1  | S5               | 108.01(4) | S1              | Sr3  | S3 <sup>9</sup>  | 159.49(4)  |
| S6               | Rb1  | S6 <sup>3</sup>  | 67.07(3)  | S1              | Sr3  | S3 <sup>10</sup> | 76.30(4)   |
| Cl1              | Sr1  | S3 <sup>3</sup>  | 145.04(4) | S1              | Sr3  | S4 <sup>9</sup>  | 139.98(4)  |
| Cl1              | Sr1  | S3 <sup>4</sup>  | 71.02(4)  | S1              | Sr3  | S4 <sup>10</sup> | 101.08(3)  |
| Cl1              | Sr1  | S4               | 132.15(4) | S1 <sup>7</sup> | Sr3  | S4 <sup>10</sup> | 112.63(4)  |
| Cl1              | Sr1  | S6 <sup>3</sup>  | 84.97(4)  | S2 <sup>7</sup> | Sr3  | S1 <sup>7</sup>  | 57.61(3)   |
| Cl1              | Sr1  | S6 <sup>4</sup>  | 122.26(4) | S2 <sup>7</sup> | Sr3  | S2               | 110.76(5)  |
| S3 <sup>4</sup>  | Sr1  | S3 <sup>3</sup>  | 98.63(4)  | S2              | Sr3  | Cl1 <sup>8</sup> | 130.02(4)  |
| S3 <sup>4</sup>  | Sr1  | S4               | 151.02(4) | S2 <sup>7</sup> | Sr3  | Cl1 <sup>8</sup> | 67.67(4)   |
| S3 <sup>4</sup>  | Sr1  | S6 <sup>3</sup>  | 76.94(4)  | S2 <sup>7</sup> | Sr3  | S4 <sup>10</sup> | 166.98(4)  |
| S3 <sup>3</sup>  | Sr1  | S6 <sup>3</sup>  | 60.07(4)  | S2              | Sr3  | S4 <sup>10</sup> | 69.33(3)   |

|                  |     |                  |           |                  |     |                  |           |
|------------------|-----|------------------|-----------|------------------|-----|------------------|-----------|
| Cl1 <sup>8</sup> | Sr3 | S1 <sup>7</sup>  | 124.45(4) | S3 <sup>10</sup> | Sr3 | S4 <sup>9</sup>  | 88.44(4)  |
| Cl1 <sup>8</sup> | Sr3 | S4 <sup>10</sup> | 122.90(4) | S2               | Sr3 | S1 <sup>7</sup>  | 67.75(3)  |
| S3 <sup>10</sup> | Sr3 | S1 <sup>7</sup>  | 165.11(4) | S4 <sup>9</sup>  | Sr3 | S1 <sup>7</sup>  | 103.95(4) |
| S3 <sup>9</sup>  | Sr3 | S1 <sup>7</sup>  | 73.17(4)  | S4 <sup>9</sup>  | Sr3 | S2               | 160.98(4) |
| S3 <sup>9</sup>  | Sr3 | S2 <sup>7</sup>  | 100.90(4) | S4 <sup>9</sup>  | Sr3 | S2 <sup>7</sup>  | 75.62(4)  |
| S3 <sup>10</sup> | Sr3 | S2               | 97.91(4)  | S4 <sup>9</sup>  | Sr3 | Cl1 <sup>8</sup> | 68.96(4)  |
| S3 <sup>10</sup> | Sr3 | S2 <sup>7</sup>  | 135.14(4) | S4 <sup>9</sup>  | Sr3 | S4 <sup>10</sup> | 100.33(4) |
| S3 <sup>9</sup>  | Sr3 | S2               | 100.58(4) | S1               | B1  | S2               | 115.2(3)  |
| S3 <sup>9</sup>  | Sr3 | Cl1 <sup>8</sup> | 129.28(4) | S5               | B1  | S1               | 124.0(3)  |
| S3 <sup>10</sup> | Sr3 | Cl1 <sup>8</sup> | 67.47(4)  | S5               | B1  | S2               | 120.7(3)  |
| S3 <sup>9</sup>  | Sr3 | S3 <sup>10</sup> | 107.02(5) | S3               | B2  | S4               | 116.9(4)  |
| S3 <sup>9</sup>  | Sr3 | S4 <sup>9</sup>  | 60.40(4)  | S6               | B2  | S3               | 118.3(3)  |
| S3 <sup>10</sup> | Sr3 | S4 <sup>10</sup> | 56.03(4)  | S6               | B2  | S4               | 124.7(4)  |
| S3 <sup>9</sup>  | Sr3 | S4 <sup>10</sup> | 66.75(4)  |                  |     |                  |           |

Symmetry transformations used to generate equivalent atoms:

<sup>1</sup>1-X,2-Y,1-Z; <sup>2</sup>1-X,1/2+Y,3/2-Z; <sup>3</sup>1/2-X,1/2+Y,+Z; <sup>4</sup>1/2+X,3/2-Y,1-Z; <sup>5</sup>1-X,1-Y,1-Z;  
<sup>6</sup>1/2+X,+Y,3/2-Z; <sup>7</sup>1/2-X,-1/2+Y,+Z; <sup>8</sup>1-X,-1/2+Y,3/2-Z; <sup>9</sup>+X,1/2-Y,1/2+Z; <sup>10</sup>1/2-X,1-Y,1/2+Z;  
<sup>11</sup>-X,1/2+Y,3/2-Z; <sup>12</sup>-X,1-Y,1-Z; <sup>13</sup>-1/2+X,3/2-Y,1-Z; <sup>14</sup>-1/2+X,+Y,3/2-Z; <sup>15</sup>-X,-1/2+Y,3/2-Z;  
<sup>16</sup>1/2-X,1-Y,-1/2+Z; <sup>17</sup>+X,1/2-Y,-1/2+Z

**Table S7. Selected bond angles [°] for [RbSr<sub>3</sub>Br][(BS<sub>3</sub>)<sub>2</sub>].**

| Atom             | Atom | Atom             | Angle/°   | Atom            | Atom | Atom             | Angle/°     |
|------------------|------|------------------|-----------|-----------------|------|------------------|-------------|
| Br1              | Rb1  | Br1 <sup>9</sup> | 99.57(3)  | S1 <sup>2</sup> | Sr1  | S2 <sup>2</sup>  | 58.22(4)    |
| Br1              | Rb1  | S1 <sup>14</sup> | 123.95(4) | S2 <sup>2</sup> | Sr1  | Br1 <sup>1</sup> | 125.44(3)   |
| Br1              | Rb1  | S1 <sup>11</sup> | 123.95(4) | S2 <sup>3</sup> | Sr1  | Br1 <sup>1</sup> | 68.93(3)    |
| Br1              | Rb1  | S2 <sup>13</sup> | 138.70(3) | S2 <sup>4</sup> | Sr1  | Br1 <sup>1</sup> | 125.44(3)   |
| Br1              | Rb1  | S2 <sup>12</sup> | 138.70(3) | S2              | Sr1  | Br1 <sup>1</sup> | 68.93(3)    |
| Br1 <sup>9</sup> | Rb1  | S2 <sup>12</sup> | 60.45(3)  | S2              | Sr1  | S1 <sup>4</sup>  | 87.98(4)    |
| Br1 <sup>9</sup> | Rb1  | S2 <sup>13</sup> | 60.45(3)  | S2 <sup>2</sup> | Sr1  | S1               | 107.36(4)   |
| S1 <sup>14</sup> | Rb1  | Br1 <sup>9</sup> | 121.83(3) | S2 <sup>3</sup> | Sr1  | S1 <sup>3</sup>  | 57.99(4)    |
| S1 <sup>11</sup> | Rb1  | Br1 <sup>9</sup> | 121.83(3) | S2 <sup>3</sup> | Sr1  | S1 <sup>4</sup>  | 136.75(4)   |
| S1 <sup>14</sup> | Rb1  | S1 <sup>11</sup> | 65.47(5)  | S2 <sup>3</sup> | Sr1  | S1               | 101.18(4)   |
| S1 <sup>14</sup> | Rb1  | S2 <sup>12</sup> | 61.38(3)  | S2 <sup>4</sup> | Sr1  | S1 <sup>3</sup>  | 107.36(4)   |
| S1 <sup>14</sup> | Rb1  | S2 <sup>13</sup> | 96.29(4)  | S2 <sup>3</sup> | Sr1  | S1 <sup>2</sup>  | 87.98(4)    |
| S1 <sup>11</sup> | Rb1  | S2 <sup>12</sup> | 96.29(4)  | S2              | Sr1  | S1               | 57.99(4)    |
| S1 <sup>11</sup> | Rb1  | S2 <sup>13</sup> | 61.38(3)  | S2 <sup>2</sup> | Sr1  | S1 <sup>3</sup>  | 67.20(3)    |
| S2 <sup>12</sup> | Rb1  | S2 <sup>13</sup> | 65.93(4)  | S2              | Sr1  | S1 <sup>2</sup>  | 136.75(4)   |
| S3 <sup>10</sup> | Rb1  | Br1              | 74.65(3)  | S2              | Sr1  | S1 <sup>3</sup>  | 101.18(4)   |
| S3               | Rb1  | Br1              | 74.65(3)  | S2 <sup>4</sup> | Sr1  | S1               | 67.20(3)    |
| S3               | Rb1  | Br1 <sup>9</sup> | 72.54(3)  | S2 <sup>3</sup> | Sr1  | S2 <sup>4</sup>  | 164.94(3)   |
| S3 <sup>10</sup> | Rb1  | Br1 <sup>9</sup> | 72.54(3)  | S2              | Sr1  | S2 <sup>4</sup>  | 97.74(4)    |
| S3 <sup>10</sup> | Rb1  | S1 <sup>14</sup> | 83.18(4)  | S2 <sup>2</sup> | Sr1  | S2 <sup>4</sup>  | 77.72(5)    |
| S3 <sup>10</sup> | Rb1  | S1 <sup>11</sup> | 148.59(4) | S2 <sup>3</sup> | Sr1  | S2 <sup>2</sup>  | 97.74(4)    |
| S3               | Rb1  | S1 <sup>14</sup> | 148.59(4) | S2 <sup>3</sup> | Sr1  | S2               | 82.94(5)    |
| S3               | Rb1  | S1 <sup>11</sup> | 83.18(4)  | S2              | Sr1  | S2 <sup>2</sup>  | 164.94(3)   |
| S3               | Rb1  | S2 <sup>12</sup> | 123.90(4) | S1 <sup>6</sup> | Sr2  | Br1              | 72.10(3)    |
| S3 <sup>10</sup> | Rb1  | S2 <sup>13</sup> | 123.90(4) | S1 <sup>7</sup> | Sr2  | Br1              | 138.59(3)   |
| S3 <sup>10</sup> | Rb1  | S2 <sup>12</sup> | 65.13(3)  | S1 <sup>6</sup> | Sr2  | S1 <sup>7</sup>  | 147.26(2)   |
| S3               | Rb1  | S2 <sup>13</sup> | 65.13(3)  | S1 <sup>6</sup> | Sr2  | S2               | 91.55(4)    |
| S3               | Rb1  | S3 <sup>10</sup> | 128.05(6) | S1 <sup>7</sup> | Sr2  | S2               | 71.29(4)    |
| S1 <sup>3</sup>  | Sr1  | Br1 <sup>1</sup> | 126.89(3) | S1 <sup>6</sup> | Sr2  | S2 <sup>5</sup>  | 89.89(4)    |
| S1 <sup>4</sup>  | Sr1  | Br1 <sup>1</sup> | 68.34(3)  | S1 <sup>6</sup> | Sr2  | S3 <sup>7</sup>  | 150.56(4)   |
| S1               | Sr1  | Br1 <sup>1</sup> | 126.89(3) | S1 <sup>7</sup> | Sr2  | S3 <sup>7</sup>  | 60.00(4)    |
| S1 <sup>2</sup>  | Sr1  | Br1 <sup>1</sup> | 68.34(3)  | S1 <sup>7</sup> | Sr2  | S3 <sup>6</sup>  | 88.57(3)    |
| S1 <sup>4</sup>  | Sr1  | S1 <sup>3</sup>  | 164.22(3) | S1 <sup>6</sup> | Sr2  | S3 <sup>6</sup>  | 59.30(4)    |
| S1 <sup>2</sup>  | Sr1  | S1 <sup>4</sup>  | 70.42(5)  | S2              | Sr2  | Br1              | 138.12(3)   |
| S1 <sup>4</sup>  | Sr1  | S1               | 109.39(4) | S2 <sup>5</sup> | Sr2  | Br1              | 70.89(3)    |
| S1 <sup>2</sup>  | Sr1  | S1               | 164.22(3) | S2 <sup>5</sup> | Sr2  | S1 <sup>7</sup>  | 91.62(4)    |
| S1 <sup>2</sup>  | Sr1  | S1 <sup>3</sup>  | 109.39(4) | S2 <sup>5</sup> | Sr2  | S2               | 149.343(17) |
| S1               | Sr1  | S1 <sup>3</sup>  | 66.26(5)  | S2              | Sr2  | S3 <sup>6</sup>  | 72.72(3)    |
| S1 <sup>2</sup>  | Sr1  | S2 <sup>4</sup>  | 101.36(4) | S2 <sup>5</sup> | Sr2  | S3 <sup>6</sup>  | 81.85(4)    |
| S1 <sup>4</sup>  | Sr1  | S2 <sup>2</sup>  | 101.36(4) | S2              | Sr2  | S3 <sup>7</sup>  | 114.34(3)   |
| S1 <sup>4</sup>  | Sr1  | S2 <sup>4</sup>  | 58.22(4)  | S2 <sup>5</sup> | Sr2  | S3 <sup>7</sup>  | 75.08(4)    |

|                 |     |                 |           |                 |     |                 |           |
|-----------------|-----|-----------------|-----------|-----------------|-----|-----------------|-----------|
| S3              | Sr2 | Br1             | 81.37(3)  | S3              | Sr2 | S3 <sup>7</sup> | 82.84(2)  |
| S3 <sup>7</sup> | Sr2 | Br1             | 79.03(3)  | S3              | Sr2 | S3 <sup>6</sup> | 129.42(5) |
| S3              | Sr2 | S1 <sup>6</sup> | 98.16(4)  | S3 <sup>7</sup> | Sr2 | S3 <sup>6</sup> | 139.68(4) |
| S3              | Sr2 | S1 <sup>7</sup> | 98.11(4)  | S1              | B1  | S2              | 116.0(3)  |
| S3              | Sr2 | S2              | 62.63(3)  | S3              | B1  | S1              | 120.1(3)  |
| S3              | Sr2 | S2 <sup>5</sup> | 147.17(4) | S3              | B1  | S2              | 123.9(3)  |

Symmetry transformations used to generate equivalent atoms:

<sup>1</sup>3/2-X,3/2-Y,1/2+Z; <sup>2</sup>2-X,1-Y,1/2+Z; <sup>3</sup>2-X,+Y,+Z; <sup>4</sup>+X,1-Y,1/2+Z; <sup>5</sup>3/2-X,3/2-Y,-1/2+Z; <sup>6</sup>3/2-X,1/2+Y,+Z; <sup>7</sup>+X,1-Y,-1/2+Z; <sup>8</sup>1-X,1-Y,-1/2+Z; <sup>9</sup>1-X,1-Y,1/2+Z; <sup>10</sup>1-X,+Y,+Z; <sup>11</sup>3/2-X,1/2-Y,-1/2+Z; <sup>12</sup>-1/2+X,-1/2+Y,+Z; <sup>13</sup>3/2-X,-1/2+Y,+Z; <sup>14</sup>-1/2+X,1/2-Y,-1/2+Z; <sup>15</sup>2-X,1-Y,-1/2+Z; <sup>16</sup>3/2-X,1/2-Y,1/2+Z; <sup>17</sup>1/2+X,1/2+Y,+Z

**Table S8. The calculated band gaps (in GGA), birefringence, the largest SHG coefficients of Sr<sub>3</sub>B<sub>2</sub>S<sub>6</sub> and [RbSr<sub>3</sub>X][(BS<sub>3</sub>)<sub>2</sub>] (X = Cl, Br).**

| <b>Formula</b>                                           | <b>Symmetry</b> | <b>Band gap</b> | <b>Birefringence</b> | <b>SHG tensor</b> |
|----------------------------------------------------------|-----------------|-----------------|----------------------|-------------------|
| Sr <sub>3</sub> B <sub>2</sub> S <sub>6</sub>            | CS              | 2.30 eV         | 0.197 at 1064nm      | /                 |
| [RbSr <sub>3</sub> Cl][(BS <sub>3</sub> ) <sub>2</sub> ] | CS              | 2.60 eV         | 0.136 at 1064nm      | /                 |
| [RbSr <sub>3</sub> Br][(BS <sub>3</sub> ) <sub>2</sub> ] | NCS             | 2.59 eV         | 0.138 at 1064nm      | 1.77 pm/V         |

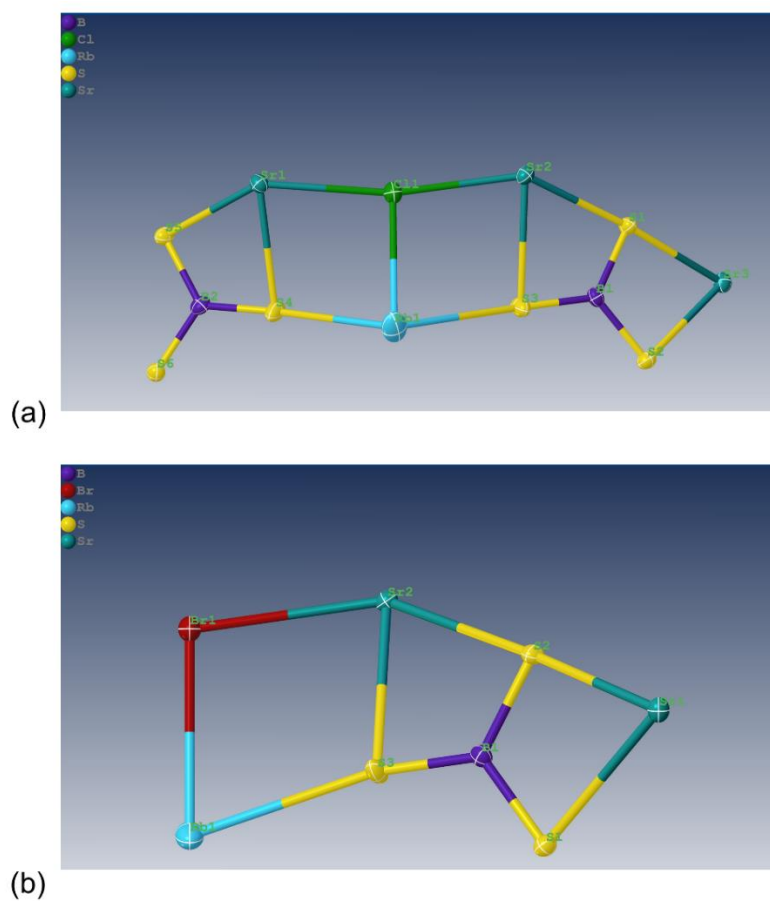

**Figure S1.** Ellipsoids styles of  $[\text{RbSr}_3\text{X}][(\text{BS}_3)_2]$  ( $\text{X} = \text{Cl}, \text{Br}$ ) structures (using Olex2).  
 a) Ellipsoids styles of  $[\text{RbSr}_3\text{Cl}][(\text{BS}_3)_2]$ ; b) Ellipsoids styles of  $[\text{RbSr}_3\text{Br}][(\text{BS}_3)_2]$ .



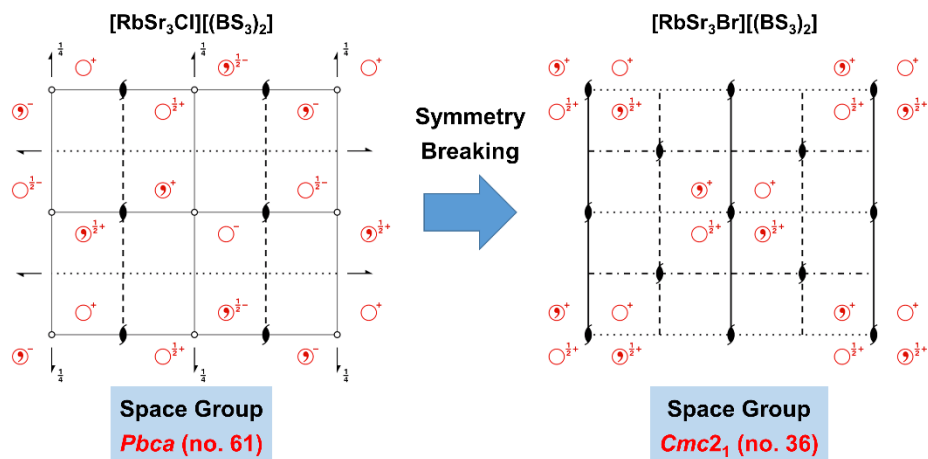

**Figure S2.** Spatial symmetry operation change from CS [RbSr<sub>3</sub>Cl][(BS<sub>3</sub>)<sub>2</sub>] [high symmetry *Pbc*<sub>a</sub> (no. 61)] to NCS [RbSr<sub>3</sub>Br][(BS<sub>3</sub>)<sub>2</sub>] [low symmetry *Cmc*<sub>2</sub><sub>1</sub> (no. 36)].

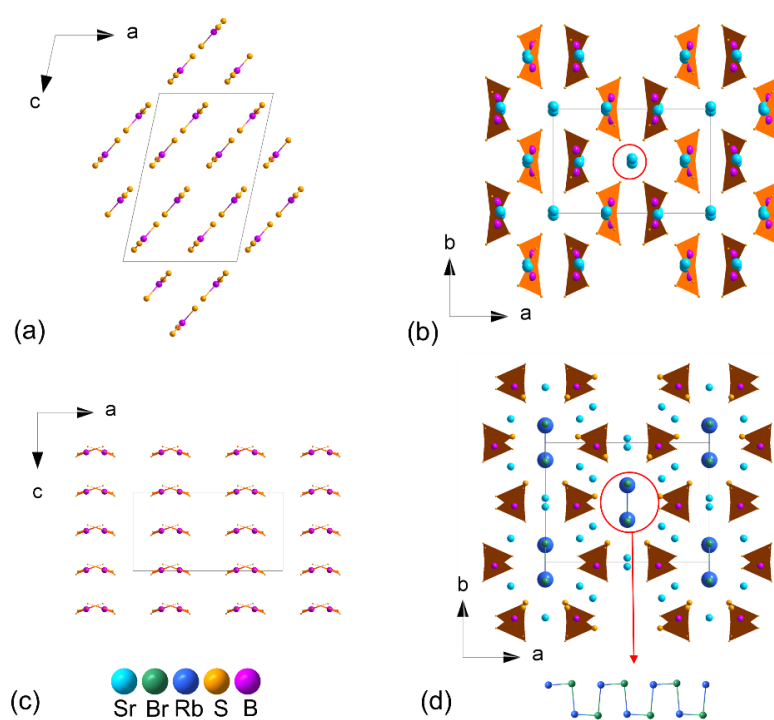

**Figure S3.** The structural comparison between  $\text{Sr}_3\text{B}_2\text{S}_6$  and title compounds (taking  $[\text{RbSr}_3\text{Br}][(\text{BS}_3)_2]$  as an example). a and b) The arrangement of  $[\text{BS}_3]$  units and structure of  $\text{Sr}_3\text{B}_2\text{S}_6$ ; c and d) The arrangement of  $[\text{BS}_3]$  units and structure of  $[\text{RbSr}_3\text{Br}][(\text{BS}_3)_2]$ .

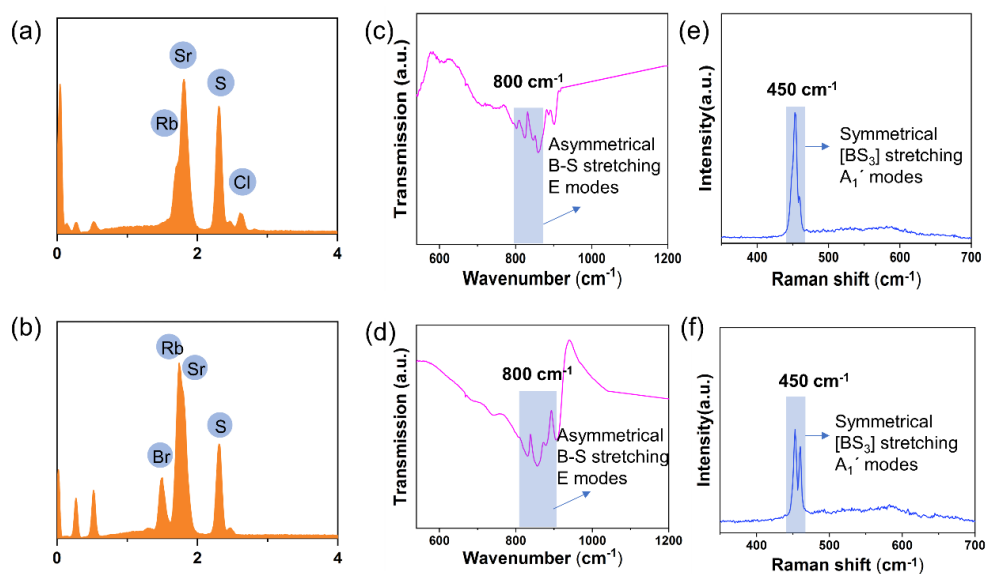

**Figure S4.** The experimental measurements of  $[\text{RbSr}_3\text{X}][(\text{BS}_3)_2]$  ( $\text{X} = \text{Cl}, \text{Br}$ ). a and b) The Energy dispersive X-ray spectroscopy; c and d) The Raman spectra; e and f) The IR absorption spectra.

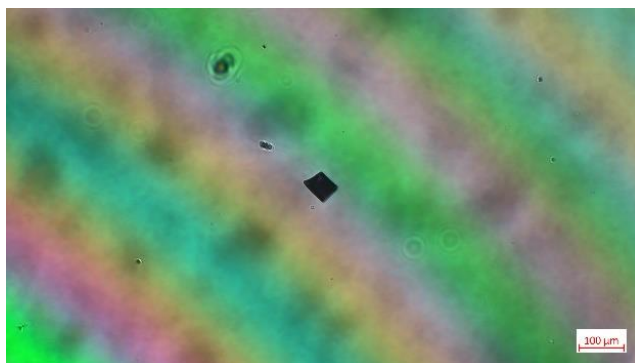

**Figure S5.** The birefringence measurement of  $[\text{RbSr}_3\text{Cl}][(\text{BS}_3)_2]$ .

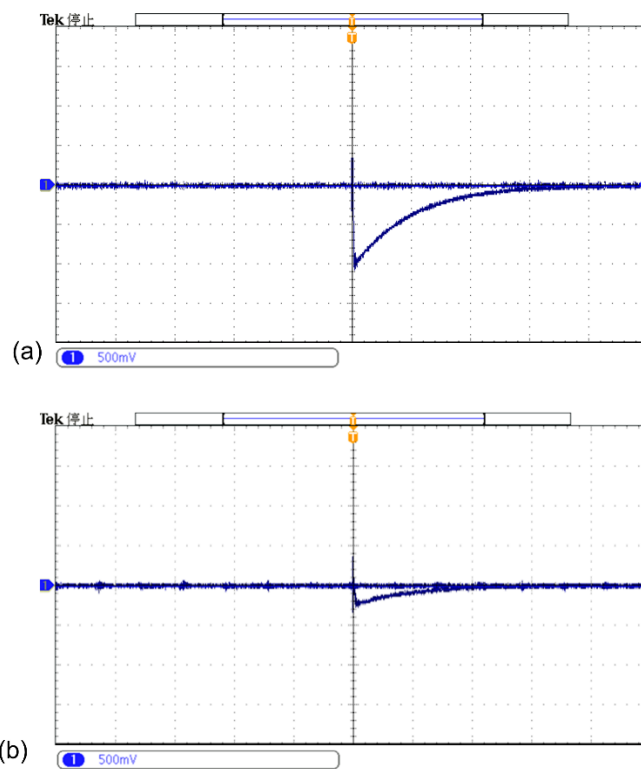

**Figure S6.** The SHG measurement of  $[\text{RbSr}_3\text{Br}][(\text{BS}_3)_2]$ . a) The signal strength of AGS; b) The signal strength of  $[\text{RbSr}_3\text{Br}][(\text{BS}_3)_2]$ .

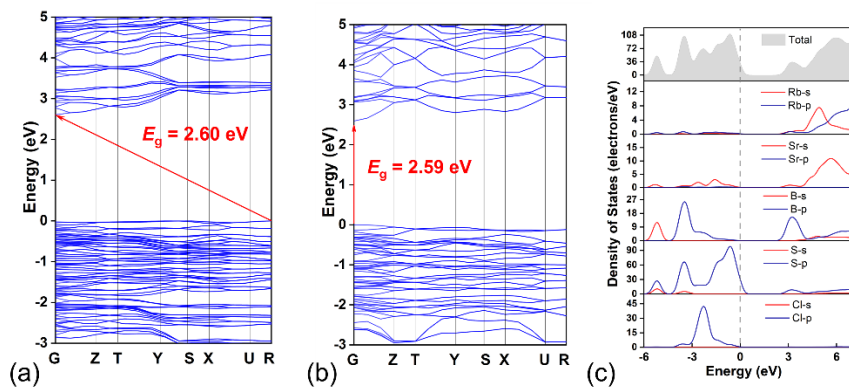

**Figure S7.** The calculated results of [RbSr<sub>3</sub>X][(BS<sub>3</sub>)<sub>2</sub>] (X = Cl, Br). a and b) Band structures of [RbSr<sub>3</sub>X][(BS<sub>3</sub>)<sub>2</sub>] (X = Cl, Br); c) Density of states of [RbSr<sub>3</sub>Cl][(BS<sub>3</sub>)<sub>2</sub>]

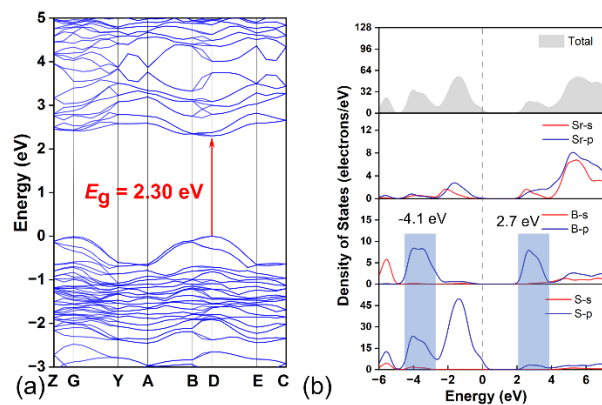

**Figure S8.** The calculated results of  $\text{Sr}_3\text{B}_2\text{S}_6$ . a) Band structure; b) Density of states.

## Reference

1. B. Macías, I. García, M. V. Villa, J. Borrás, A. Castiñeiras, F. Sanz, *Z. Anorg. Allg. Chem.*, 2003, **629**, 255-260.
2. G. Kortüm, in *Reflectance Spectroscopy: Principles, Methods, Applications* (Ed.: G. Kortüm), Springer Berlin Heidelberg, Berlin, Heidelberg, 1969, pp. 170-216.
3. J. Guo, A. Tudi, S. Han, Z. Yang, S. Pan, *Angew. Chem. Int. Ed.*, 2019, **58**, 17675-17678.
4. G. Peng, C. Lin, D. Zhao, L. Cao, H. Fan, K. Chen, N. Ye, *Chem. Commun.*, 2019, **55**, 11139-11142.
5. C. Wu, X. Jiang, L. Lin, Z. Lin, Z. Huang, M. G. Humphrey, C. Zhang, *Chem. Mater.*, 2020, **32**, 6906-6915.
6. S. K. Kurtz, T. T. Perry, *J. Appl. Phys.*, 1968, **39**, 3798-3813.
7. P. Geerlings, F. De Proft, W. Langenaeker, *Chem. Rev.*, 2003, **103**, 1793-1874.
8. J. P. Perdew, K. Burke, M. Ernzerhof, *Phys. Rev. Lett.*, 1996, **77**, 3865-3868.
9. A. M. Rappe, K. M. Rabe, E. Kaxiras, J. D. Joannopoulos, *Phys. Rev. B*, 1990, **41**, 1227-1230.
10. J. S. Lin, A. Qteish, M. C. Payne, V. Heine, *Phys. Rev. B*, 1993, **47**, 4174-4180.
11. S. J. Clark, M. D. Segall, C. J. Pickard, P. J. Hasnip, M. I. J. Probert, K. Refson, M. C. Payne, *Z. Kristallogr. - Cryst. Mater.*, 2005, **220**, 567-570.
12. J. Heyd, G. E. Scuseria, M. Ernzerhof, *J. Chem. Phys.*, 2003, **118**, 8207-8215.
13. J. Lin, M. Lee, Z. Liu, C. Chen, C. J. Pickard, *Phys. Rev. B*, 1999, **60**, 13380-13389.
14. B. Lei, Z. Yang, S. Pan, *Chem. Commun.*, 2017, **53**, 2818-2821.
